# Supplementary material
Source: PubMed Central journal article supplement (PMC4732412)
Supplement: itxc_a_1090948_sm9488.pdf [file itxc_a_1090948_sm9488.pdf]

**SUPPLEMENTAL MATERIAL**

**A Critical Review of Neonicotinoid Insecticides  
for Developmental Neurotoxicity**

**by**

**LP Sheets, AA Li, DJ Minnema, RH Collier, MR Creek and RC Peffer**

**Critical Reviews in Toxicology, 2015**

## **Appendix I: Neuropathology and Morphometry Procedures for the guideline DNT study with Imidacloprid**

### ***Neuropathology and Morphometry – PND 11***

Brains were divided into eight coronal blocks (including forebrain, cerebrum, midbrain, cerebellum, pons and medulla oblongata) for microscopic examination (Fig. 1). Each block was processed according to standard procedures for paraffin embedding and sectioned at 5  $\mu\text{m}$ , with slides prepared with hematoxylin and eosin (H&E), luxol fast blue/cresyl violet and Sevier-Munger stains.

Seven linear measurements were taken from brain sections (levels 4, 5 and 7), as follows:

- (1) **Frontal cortex thickness** (forebrain); the dorsal portion of the cerebral cortex within the coronal section passing through the region of the optic chiasm;
- (2) **Parietal cortex thickness** (forebrain); the dorsolateral portion of the cerebral cortex within the coronal section taken through the optic chiasm;
- (3) **Caudate putamen horizontal width** (forebrain; maximum cross-sectional width) - performed on the coronal section, taken at the level of the optic chiasm;
- (4) **Corpus callosum thickness** (forebrain) - at the mid-point, from the section taken at the level of the optic chiasm;
- (5) **Hippocampal gyrus thickness** (midbrain) - the full width of the hippocampal gyrus from the ventral tail of the dentate gyrus to the overlying subcortical white matter;
- (6) **Cerebellum height** (cerebellum/pons) - from the roof of the fourth ventricle to the dorsal surface; and
- (7) **External germinal layer** (cerebellum) thickness (cerebellum/pons; PND 11 only) - due to considerable regional differences in thickness, multiple areas were measured over the dorsum of the cerebellum.

### ***Neuropathology and Morphometry – PND 75***

The brain and spinal cord, both eyes (with optic nerves) and selected (bilateral) peripheral nerves (sciatic, tibial, and sural), the gasserian ganglion, gastrocnemius muscle, and both forelimbs were collected from each animal and post-fixed in 10% buffered formalin. The fixed brain was weighed upon removal from the skull, before placement into formalin.

Vernier calipers were used to obtain two linear measurements of the brain, as described for the PND 11 pups. The following tissues from control and high-dose perfused animals, and any gross lesions collected at necropsy, were routinely processed for microscopic examination:

- 8 coronal sections of the brain, including forebrain, center of cerebrum, midbrain, cerebellum, pons, and medulla oblongata;
- 4 sections from 3 levels of the spinal cord (cervical, thoracic, and lumbar) and the cauda equina were embedded in paraffin and stained with H&E, luxol fast blue/cresyl violet, and Sevier-Munger stains;
- Eyes, optic nerves, and gastrocnemius muscle were embedded in paraffin and stained with H&E;
- Dorsal root ganglia (including dorsal and ventral root fibers) from the cervical and lumbar swellings, gasserian ganglia, and peripheral nerve tissues (sciatic, tibial, and sural) were embedded in glycol methacrylate resin (GMA), sectioned at 2-3  $\mu\text{m}$ , and stained with a modified Lee's stain.

Microscopic evaluation and measurements of brain tissue were performed as described for the PND 11 animals, with modifications appropriate for the adult.

The CHECKED (X) tissues will be evaluated for adult offspring.

| <b>CENTRAL NERVOUS SYSTEM</b> |                                    | <b>PERIPHERAL NERVOUS SYSTEM</b> |                                           |
|-------------------------------|------------------------------------|----------------------------------|-------------------------------------------|
|                               | <b>BRAIN (8 levels, including)</b> |                                  | <b>PERIPHERAL NERVES</b>                  |
| x                             | Forebrain                          | x                                | Sciatic                                   |
| x                             | Center of cerebrum                 | x                                | Tibial                                    |
| x                             | Midbrain                           | x                                | Sural                                     |
| x                             | Cerebellum                         |                                  |                                           |
| x                             | Pons                               |                                  |                                           |
| x                             | Medulla oblongata                  |                                  |                                           |
|                               | <b>SPINAL CORD</b>                 |                                  | <b>OTHER</b>                              |
| x                             | Cervical swelling                  | x                                | Lumbar dorsal root ganglion               |
| x                             | Thoracic                           | x                                | Lumbar dorsal root fibers <sup>⓪</sup>    |
| x                             | Lumbar swelling                    | x                                | Lumbar ventral root fibers <sup>⓪</sup>   |
|                               | <b>OTHER</b>                       | x                                | Cervical dorsal root ganglion             |
| x                             | Gasserian Ganglion                 | x                                | Cervical dorsal root fibers <sup>⓪</sup>  |
| x                             | Optic nerves                       | x                                | Cervical ventral root fibers <sup>⓪</sup> |
| x                             | Eyes                               | x                                | Gastrocnemius muscle                      |
| x                             | Cauda equina                       |                                  |                                           |

<sup>⓪</sup> Dorsal and ventral root fibers were evaluated as they were generally included with the ganglion.

### Adult Neurotoxicity Trimming Guide

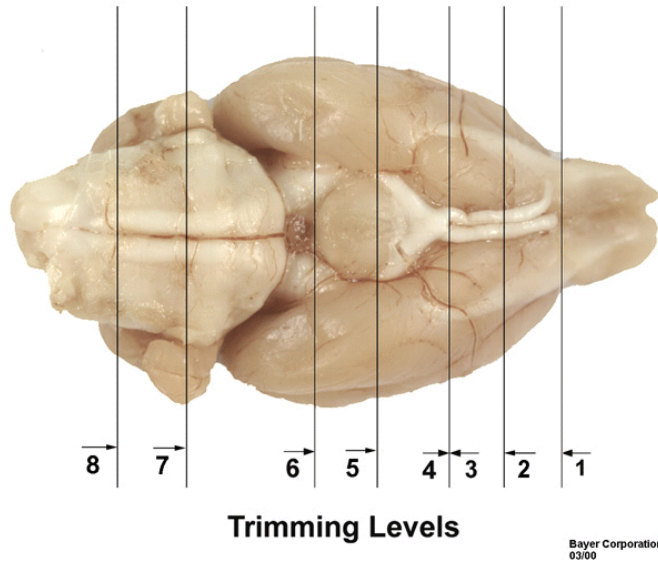

### Levels 4 and 5 (Level 7 is not shown)

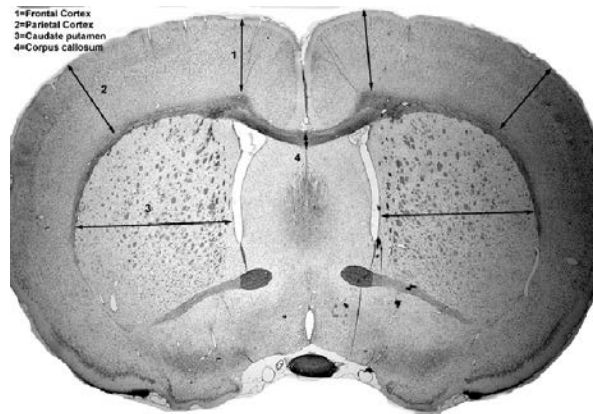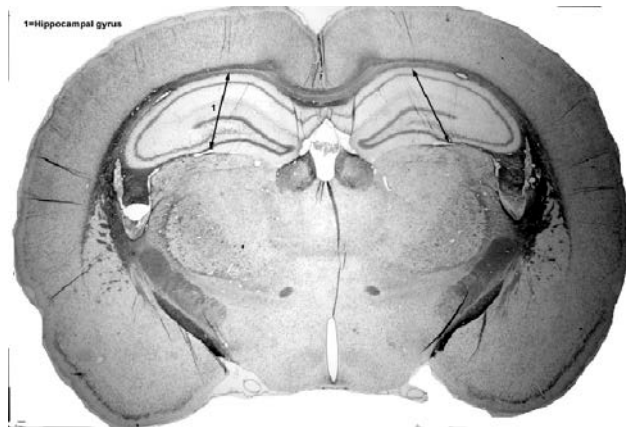

## RAT BRAIN LEVEL SECTIONS 1 - 8

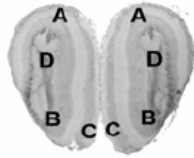

**OLFACTORY BULB SECTION**  
Figure 1. Rat Brain Level 1  
A = External Plexiform Layer  
B = Granular Cell Layer  
C = Olfactory Nerve Layer  
D = Olfactory Ventricle

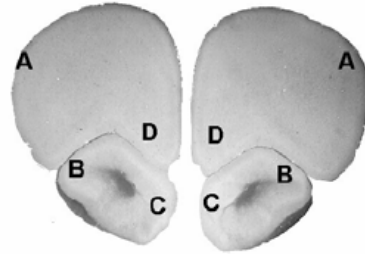

**OLFACTORY REGION SECTION**  
Figure 2. Rat Brain Level 2  
A = Motor Cortex  
B = Olfactory Nucleus  
C = Olfactory Ventricle  
D = Orbital Cortex

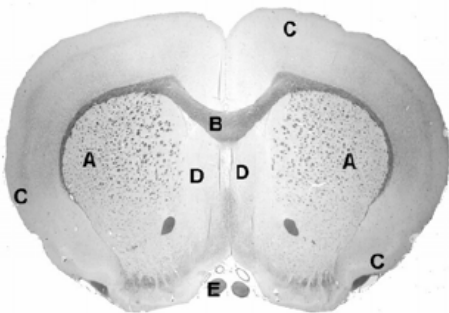

**FOREBRAIN (optic nerve) SECTION**  
Figure 3. Rat Brain Level 3  
A = Caudate Putamen  
B = Corpus Callosum  
C = Cortex  
D = Lateral Septal Nucleus  
E = Optic Nerves

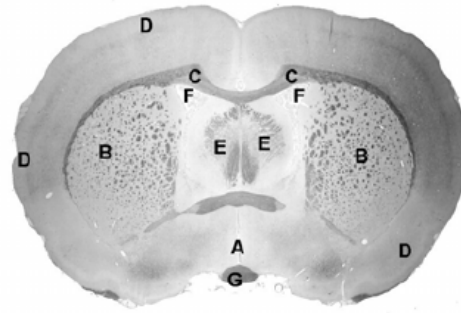

**FOREBRAIN (Optic Chiasma) SECTION**  
Figure 4. Rat Brain Level 4  
A = 3<sup>rd</sup> Ventricle  
B = Caudate Putamen  
C = Corpus Callosum  
D = Cortex  
E = Lateral Septal Nucleus  
F = Lateral Ventricle  
G = Optic Chiasma

## RAT BRAIN LEVEL SECTIONS 1 - 8

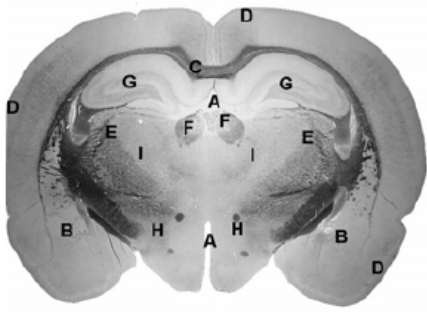

**MIDBRAIN SECTION**  
Figure 5. Rat Brain Level 5  
A = 3<sup>rd</sup> Ventricle  
B = Amygdaloid Nucleus  
C = Corpus Callosum  
D = Cortex  
E = Geniculate Nucleus  
F = Habenular Nucleus  
G = Hippocampus  
H = Hypothalamus  
I = Thalamic Nucleus

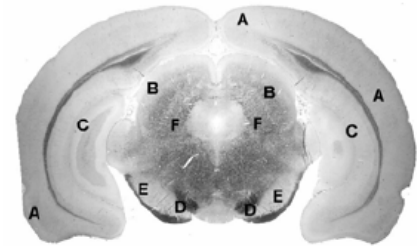

**MESENCEPHALON SECTION**  
Figure 6. Rat Brain Level 6  
A = Cortex  
B = Geniculate Nucleus  
C = Hippocampus  
D = Mammillary Nucleus  
E = Substantia Nigra  
F = Thalamus

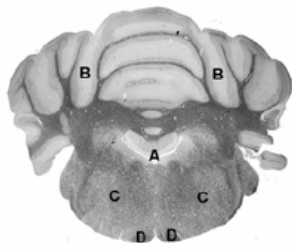

**CEREBELLUM/PONS SECTION**  
Figure 7. Rat Brain Level 7  
A = 4<sup>th</sup> Ventricle  
B = Cerebellum  
C = Medulla Oblongata  
D = Pyramidal Tract

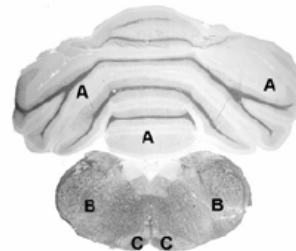

**CEREBELLUM/MEDULLA OBLONGATA SECTION**  
Figure 8. Rat Brain Level 8  
A = Cerebellum  
B = Medulla Oblongata  
C = Pyramidal Tract

## **Appendix II: Occupational and Residential Exposure and Risk Assessment for Imidacloprid and Flumethrin Formulated Flea Collars (from Lunchick, 2010).**

### **SUMMARY**

An assessment of the potential exposure resulting from the use of PNR 1427 flea collars containing imidacloprid as an active ingredient was calculated for post application contact with treated cats, small dogs, and large dogs. The small flea collars weigh 12.5 grams and contain 1.25 grams imidacloprid and are intended for use on cats or small dogs up to 8 kg in weight. The large flea collar is intended for dogs weighing over 8 kg and weighs 45.0 grams, with 4.5 grams of imidacloprid.

The daily application rate of imidacloprid from the collars to the pets was determined based on release rate kinetic studies. Approximately 40% of the imidacloprid is released over an eight month period at a rate that slightly decreases over the period. During the first month of use when the release rate is slightly greater, the daily rate of release of imidacloprid from the small collar is 8.35 mg/day and from the large collar it is 22.7 mg/day. Fur kinetic data supported the release rate kinetics.

The revised HED guidelines for pet exposure and risk assessments were used with the release rate data to estimate the exposure and risks to both adults and small children contacting pets wearing the collars. Margins of Exposure (MOEs) for adult post application contact with the treated pets ranged from 2,200 to 4,400. The aggregate oral and dermal MOEs for small children ranged from 1,300 to 2,600.

### **INTRODUCTION**

PNR 1427T and PNR 1427G are antiparasitic collars for flea and tick control for cats and dogs, respectively. Both collars contain 10% imidacloprid as an active ingredient. The collars will be used for an eight month period and therefore would be used once per year in many regions of the United States and no more than twice per year in the warmer regions of the country. The purpose of this exposure and risk assessment is to support the registration application for PNR 1427T and PNR 1427G.

### **PNR 1427 Release Kinetics**

The flea collar contains a patented Bayer polymer matrix system that ensures the active ingredients are slowly and continuously released in low concentrations from the collar towards the animal. This minimizes peak concentrations and ensures that acaricidal / insecticidal concentrations are present in the dog or cat's haircoat during the entire eight month efficacy period. The active substances spread from the site of direct contact over the entire skin surface. Bayer conducted several studies to quantify the release rate of imidacloprid from the collar and also to measure residues on the animal's fur over time.

### **Toxicology (imidacloprid)**

HED selected a NOEL of 10 mg/kg/day from the rat developmental toxicity study as the most appropriate endpoint for short-term oral, dermal, and inhalation exposure risk assessments. A NOEL of 9.3 mg/kg/day from the rat subchronic neurotoxicity study was selected as the most appropriate endpoint for intermediate-term oral, dermal, and inhalation exposure risk assessments. For the purpose of this assessment the intermediate-term NOEL of 9.3 mg/kg/day is used to address both short-term and intermediate-term exposures. Based on the results of the dermal absorption study a dermal absorption adjustment of 4.2% is used for the dermal exposure risk assessment.

## **POST-APPLICATION EXPOSURE AND RISK**

Post-application exposure to imidacloprid contained in the flea collars is estimated based on the guidance provided in the “Current Guidance for Residential Exposure Risk Assessment for Pet Insecticide Treatments” of 14 January 2009. Post application exposure occurs from pet owner contact with the dog or cat wearing the flea collar. The guidance for pet flea collar assessments assumes that the daily dose on the day of application is based on 20% of the maximum application rate being available on the pet’s body and transferred to adults and children as a dislodgeable residue.

As previously stated, the cat/small dog flea collar contains 1.25 grams of imidacloprid and the large dog flea collar contains 4.50 grams of imidacloprid. Based on the kinetic data, the daily release rates are 8.35 mg/day and 22.7 mg/day of imidacloprid from the small and large collars, respectively.

The small flea collar will be used to assess exposure to a 9 lb cat and the large flea collar will be used to assess exposure to a 30 lb dog. The HED defaults for the surface area of the cat and dog are 2737 cm<sup>2</sup> for the cat and 5986 cm<sup>2</sup> for the dog. The Agency uses the single hug method to assess post application dermal exposure with a 5625 cm<sup>2</sup> surface area for 70 kg adults and 1875 cm<sup>2</sup> for a 15 kg 3 year old child.

### Post Application Dermal Exposure to Cats

Adult:  $8.35 \text{ mg a.i.} \times 0.2 \div 2737 \text{ cm}^2 \times 5625 \text{ cm}^2 \times 0.042 \div 70 \text{ kg} = 2.1 \times 10^{-3} \text{ mg/kg/day}$

Child:  $8.35 \text{ mg a.i.} \times 0.2 \div 2737 \text{ cm}^2 \times 1875 \text{ cm}^2 \times 0.042 \div 15 \text{ kg} = 3.2 \times 10^{-3} \text{ mg/kg/day}$

### Post Application Dermal Risk to Cats

Adult:  $9.3 \text{ mg/kg/day} \div 2.1 \times 10^{-3} \text{ mg/kg/day} = 4,429$

Child:  $9.3 \text{ mg/kg/day} \div 3.2 \times 10^{-3} \text{ mg/kg/day} = 2,906$

### Post Application Dermal Exposure to Dogs

Adult:  $22.7 \text{ mg a.i.} \times 0.2 \div 5986 \text{ cm}^2 \times 5625 \text{ cm}^2 \times 0.042 \div 70 \text{ kg} = 2.6 \times 10^{-3} \text{ mg/kg/day}$

Child:  $22.7 \text{ mg a.i.} \times 0.2 \div 5986 \text{ cm}^2 \times 1875 \text{ cm}^2 \times 0.042 \div 15 \text{ kg} = 4.0 \times 10^{-3} \text{ mg/kg/day}$

### Post Application Dermal Risk to Dogs

Adult:  $9.3 \text{ mg/kg/day} \div 2.6 \times 10^{-3} \text{ mg/kg/day} = 3,577$

Child:  $9.3 \text{ mg/kg/day} \div 4.0 \times 10^{-3} \text{ mg/kg/day} = 2,325$

Post application incidental oral exposure is only calculated for the three year old child. An equilibrium approach is taken by HED and assumes that 20% of the available residues are available for transfer to the hands of the child. The surface area of the hands that provide oral contact is 20 cm<sup>2</sup> and that the saliva removes 50% of the residue that is transferred to the hands. The oral NOAEL of 9.3 mg/kg/day is used to calculate the MOEs for imidacloprid. The oral incidental exposure to the child is calculated as follows:

### Post Application Incidental Oral Exposure to Cats

Child:  $8.35 \text{ mg a.i.} \times 0.2 \div 2737 \text{ cm}^2 \times 20 \text{ cm}^2 \times 0.5 \div 15 \text{ kg} = 4.07 \times 10^{-4} \text{ mg/kg/day}$

### Post Application Incidental Oral Risk to Cats



Child:  $9.3 \text{ mg/kg/day} \div 4.07 \times 10^{-4} \text{ mg/kg/day} = 22,850$

#### Post Application Incidental Oral Exposure to Dogs

Child:  $22.7 \text{ mg a.i.} \times 0.2 \div 5986 \text{ cm}^2 \times 20 \text{ cm}^2 \times 0.5 \div 15 \text{ kg} = 5.06 \times 10^{-4} \text{ mg/kg/day}$

#### Post Application Incidental Oral Risk to Dogs

Child:  $9.3 \text{ mg/kg/day} \div 5.06 \times 10^{-4} \text{ mg/kg/day} = 18,380$

### **Post Application Exposure and Risk Summary**

Adult post application exposure resulting from contact with the treated animal is by the dermal route of exposure resulting from the transfer of imidacloprid residues from the animal's fur to the adult's skin. The imidacloprid exposures were calculated to be  $2.1 \times 10^{-3} \text{ mg/kg/day}$  for animals wearing the small collar and  $2.6 \times 10^{-3} \text{ mg/kg/day}$  for animals wearing the large collar. The resultant MOEs were 4,429 and 3,577 for the small and large collars, respectively.

The total post application exposure and risk to small children contacting pets wearing the flea collars results from both the dermal contact and the incidental ingestion of imidacloprid residues from the hands. For children contacting pets wearing the small collars, the aggregate post application exposure to imidacloprid is  $3.61 \times 10^{-3} \text{ mg/kg/day}$  and  $4.51 \times 10^{-3} \text{ mg/kg/day}$  with the large collar. The dermal and oral NOAEL for imidacloprid is  $9.3 \text{ mg/kg/day}$  and the aggregate MOEs for the small child are 2,576 with the small collar and 2,062 with the large collars.

### **CONCLUSIONS**

An assessment of the potential exposure resulting from the use of PNR 1427 flea collars containing imidacloprid as an active ingredient was calculated for post application contact with treated cats, small dogs, and large dogs. The small flea collars weigh 12.5 grams and contain 1.25 grams imidacloprid and are intended for use on cats or small dogs up to 8 kg in weight. The large flea collar is intended for dogs weighing over 8 kg and weighs 45.0 grams and contains 4.5 grams of imidacloprid.

The daily application rate of imidacloprid from the collars to the pets was determined based on release rate kinetic studies. Approximately 40% of the imidacloprid is released over an eight month period at a rate that slightly decreases over the period. During the first month of use when the release rate is slightly higher the daily rate of release of imidacloprid from the small collar is  $8.35 \text{ mg/day}$  and from the large collar it is  $22.7 \text{ mg/day}$ . Fur kinetic data supported the release rate kinetics.

The revised HED guidelines for pet exposure and risk assessments were used with the release rate data to estimate the exposure and risks to adults applying the collars and to both adults and small children contacting pets wearing the collars. MOEs for adult post application contact with the treated pets ranged from 2,200 to 4,400. The aggregate oral and dermal MOEs for small children ranged from 1,300 to 2,600.

Lunchick C (2010). Occupational and residential exposure and risk assessment for PNR 1427 dog and cat collars formulated with imidacloprid and flumethrin. Bayer HealthCare Report No. 33861.

**Suppl. Table 1. Coefficients of Variation (CV) for Total Session Average Peak Startle Amplitude from DNT-like studies published by EPA scientists**

| DNT Study                                                                             | CV Weaning<br>(Habituation <sup>a</sup> )<br>(percent) | CV Adult<br>(Blank Prepulse)<br>(percent) | Reference                    |
|---------------------------------------------------------------------------------------|--------------------------------------------------------|-------------------------------------------|------------------------------|
| Maternal Separation (n=8)                                                             |                                                        | 42                                        | Stanton et al. (1992)        |
| IDPN control (n=12)                                                                   | 39                                                     | 56                                        | Crofton et al. (1993)        |
| MAM control (n=8)                                                                     |                                                        | 42                                        | Goldey et al. (1994)         |
| Methylmercury control (n=8)                                                           |                                                        | 58                                        | Goldey et al. (1994)         |
| Methanol control (n=6)                                                                |                                                        | 58                                        | Stanton et al. (1995)        |
| Propylthiouracil control (n=6)                                                        | 27                                                     | 58                                        | Goldey et al. (1995a)        |
| Aroclor 1254 (n=8)                                                                    | 27                                                     | 55                                        | Goldey et al. (1995b)        |
| Aroclor 1254 & thyroxine<br>replacement (n=8)                                         | 27                                                     | 27                                        | Goldey and Crofton<br>(1998) |
| Iodine levels (assume n=12 for<br>males based on figure legend for<br>cognitive test) |                                                        | 60                                        | Gilbert et al. (2013)        |
| Average                                                                               | 30                                                     | 51                                        |                              |

**Note:** DNT - developmental neurotoxicity  
 IDPN - 3,3'-iminodipropionitrile (a within-litter study design)  
 MAM - methylazoxymethanol  
 PND - post-natal day

<sup>a</sup> The startle reflex with blank prepulse in the reflex modification design is comparable to the startle reflex in the habituation design. The CVs were estimated from the figures which reported total session peak amplitude and the SEM. Sample size (n) was used to calculate SD from SEM [ $SD = SEM * \sqrt{n}$ ].  $CV = SD \times 100 / \text{mean}$

## REFERENCES

- Crofton KM, Peele DB, Stanton ME. Developmental neurotoxicity following neonatal exposure to 3,3'-iminodipropionitrile in the rat. *Neurotoxicol Teratol* 1993; 15:117-129.
- Gilbert ME, Hedge JM, Valentín-Blasini L, Blount BC, Kannan K, Tietge J, Zoeller RT, Crofton KM, Jarrett JM, Fisher JW. An animal model of marginal iodine deficiency during development: the thyroid axis and neurodevelopmental outcome. *Toxicol Sci.* 2013; 132(1):177-195.
- Goldey ES, O'Callaghan JP, Stanton ME, Barone S, Crofton KM. Developmental neurotoxicity: Evaluation of testing procedures with methylazoxymethanol and methylmercury. *Fundam Appl Toxicol* 1994; 23:447-464.

Goldey ES, Kehn LS, Rehnberg GL, Crofton KM. Effects of developmental hypothyroidism on auditory and motor function in the rat. *Toxicol Appl Pharmacol* 1995a; 135: 67-76.

Goldey ES, Kehn LS, Lau C, Rehnberg GL, Crofton KM. Developmental exposure to polychlorinated biphenyls (Aroclor 1254) reduced circulating thyroid hormone concentrations and causes hearing deficits in rats. *Toxicol Appl Pharmacol* 1995b; 135: 77-88.

Goldey ES and Crofton KM. Thyroxine replacement attenuates hypothyroxinemia, hearing loss, and motor deficits following developmental exposure to Aroclor 1254 in rats. *Toxicol Sci* 1998; 45(1): 94-105.

Stanton ME, Crofton KM, Gray LE, Gordon CJ, Boyes WK, Mole ML, Peele DB, Bushnell PJ. 1995. Assessment of offspring development and behavior following gestational exposure to inhaled methanol in the rat. *Fund. Appl. Toxicol.* 1995; 28:100-110.

Stanton ME, Crofton KM, Lau C. Behavioral development following daily episodes of mother-infant separation in the rat. *Fundam Appl Toxicol.* 1992;19(3):474-477.

**Suppl. Table 2. Brain Morphometry Measurements Adjusted for Terminal Body Weight – Thiamethoxam DNT Study**

|                                              | Day 11 – Adjusted for Body Weight |                |               |                  | Day 62 – Adjusted for Body Weight |                |               |                  |
|----------------------------------------------|-----------------------------------|----------------|---------------|------------------|-----------------------------------|----------------|---------------|------------------|
|                                              | 0 ppm Males                       | 4000 ppm Males | 0 ppm Females | 4000 ppm Females | 0 ppm Males                       | 4000 ppm Males | 0 ppm Females | 4000 ppm Females |
| Level 2 – Frontal Cortex – Height            | 5.50                              | 5.83           | 5.67          | 6.04             | 6.68                              | 6.51           | 6.41          | 6.47             |
| Level 2 – Frontal Cortex – Width             | 4.29                              | 4.53           | 4.44          | 4.74             | 4.84                              | 5.00           | 4.72          | 4.79             |
| Level 3 – Dorsal Cortex 1- Thickness         | 1.29                              | 1.38           | 1.32          | 1.39             | 1.58                              | <b>1.40**</b>  | 1.54          | <b>1.41*</b>     |
| Level 3 – Dorsal Cortex 2- Thickness         | 1.43                              | 1.48           | 1.46          | 1.47             | 1.89                              | 1.73           | 1.79          | 1.70             |
| Level 3 – Piriform Cortex – Thickness        | 1.02                              | 1.12           | 1.03          | 1.07             | 1.51                              | 1.38           | 1.40          | 1.42             |
| Level 3 – Hippocampus – Length from Midline  | 2.64                              | 2.62           | 2.58          | 2.46             | 2.50                              | 2.45           | 2.50          | 2.64             |
| Level 4 – Dorsal Cortex – Thickness          | 1.19                              | 1.18           | 1.21          | 1.19             | 1.54                              | 1.35           | 1.40          | 1.30             |
| Level 4 – Piriform Cortex – Thickness        | 0.96                              | 1.02           | 0.95          | 1.01             | 1.29                              | 1.33           | 1.28          | 1.38             |
| Level 4 – Corpus Callosum – Thickness        | 0.61                              | 0.52           | 0.57          | 0.50             | 0.42                              | 0.40           | 0.39          | 0.42             |
| Level 4 – Thalamus – Height                  | 4.91                              | 4.94           | 5.05          | 4.97             | 5.41                              | 5.26           | 5.18          | 5.26             |
| Level 4 – Thalamus – Width                   | 7.43                              | 7.46           | 7.58          | 7.30             | 8.83                              | 8.53           | 8.44          | <b>8.04**</b>    |
| Level 4 – Thalamus/Cortex – Overall Width    | 12.31                             | 12.21          | 12.43         | 12.08            | 14.79                             | 14.12          | 14.44         | <b>13.55**</b>   |
| Level 4 - Hippocampus – Length from Midline  | 3.89                              | 3.91           | 4.00          | 3.81             | 4.13                              | 4.04           | 4.04          | 3.91             |
| Level 4 – Hippocampus – Width Dentate Gyrus  | 0.48                              | 0.46           | 0.47          | 0.48             | 0.62                              | 0.60           | 0.60          | 0.60             |
| Level 4 – Hippocampus – Length Dentate Gyrus | 1.53                              | 1.44           | 1.41          | 1.43             | 1.63                              | 1.71           | 1.70          | 1.64             |

|                                                                       | Day 11 – Adjusted for Body Weight |                |               |                  | Day 62 – Adjusted for Body Weight |                |               |                  |
|-----------------------------------------------------------------------|-----------------------------------|----------------|---------------|------------------|-----------------------------------|----------------|---------------|------------------|
|                                                                       | 0 ppm Males                       | 4000 ppm Males | 0 ppm Females | 4000 ppm Females | 0 ppm Males                       | 4000 ppm Males | 0 ppm Females | 4000 ppm Females |
| Level 5 – Dorsal Cortex – Thickness                                   | 1.08                              | 1.09           | 1.10          | 1.11             | 1.41                              | 1.31           | 1.40          | 1.33             |
| Level 5 – Piriform Cortex – Thickness                                 | 1.05                              | 1.10           | 1.08          | 1.10             | 1.24                              | 1.23           | 1.23          | 1.20             |
| Level 5 – Thalamus Width                                              | 6.77                              | 6.50           | 6.59          | 7.04*            | 8.10                              | 7.51**         | 7.86          | 7.31**           |
| Level 5 – Hippocampus Width Dentate Gyrus                             | 0.61                              | 0.64           | 0.61          | 0.66             | 0.76                              | 0.69           | 0.74          | 0.75             |
| Level 5 – Hippocampus Width Overall                                   | 1.19                              | 1.23           | 1.26          | 1.29             | 1.56                              | 1.45*          | 1.53          | 1.49             |
| Cerebellum – Height                                                   | 3.68                              | 3.93           | 3.82          | 4.01             | 5.59                              | 5.36           | 5.48          | 5.37             |
| Cerebellum – Length                                                   | 4.26                              | 4.24           | 4.11          | 4.36             | 7.18                              | 6.94           | 6.75          | 6.75             |
| Cerebellum – Preculminate Fissure – Thickness of Outer Granular Layer | 40.1                              | 41.5           | 42.1          | 39.3             | ND                                | ND             | ND            | ND               |
| Cerebellum – Preculminate Fissure – Thickness of Molecular Layer      | 68.6                              | 73.7           | 73.1          | 73.0             | 213.8                             | 202.1          | 214.1         | 196.4            |
| Cerebellum – Preculminate Fissure – Thickness of Inner Granular Layer | 126                               | 141            | 138           | 141              | 179                               | 161            | 185           | 189              |
| Cerebellum – Prepyramidal Fissure – Thickness of Outer Granular Layer | 47.7                              | 48.4           | 45.9          | 45.0             | ND                                | ND             | ND            | ND               |
| Cerebellum – Prepyramidal Fissure – Thickness of Molecular Layer      | 59.8                              | 59.1           | 59.2          | 60.5             | 218.7                             | 198.9          | 211.5         | 196.2            |
| Cerebellum – Prepyramidal Fissure – Thickness of Inner Granular Layer | 128                               | 133            | 122           | 137              | 170                               | 156            | 151           | 158              |

Review of Neonicotinoid Insecticides for DNT (Sheets et al., 2015)

ND = not determined. Values in mm, except for thickness of cerebellum inner granular layer, outer granular layer and molecular layer ( $\mu\text{m}$ )

\* $p < 0.05$ ; \*\* $p < 0.01$  (ANCOVA on terminal body weight + Student's t-test)

**Suppl. Table 3. Historical Control Data – Brain Morphometry Measurements at Day 62 – Thiamethoxam DNT Study**

|                                                  | <b>Males – Range</b> | <b>Females – Range</b> |
|--------------------------------------------------|----------------------|------------------------|
| <b>Level 3 – Dorsal Cortex 1 – Thickness</b>     | 1.25 – 1.58          | 1.31 – 1.51            |
| <b>0 ppm – Mean</b>                              | 1.58                 | 1.51                   |
| <b>4000 ppm – Mean</b>                           | 1.40                 | 1.46                   |
|                                                  |                      |                        |
| <b>Level 4 – Thalamus – Width</b>                | NA                   | 7.6 – 8.46             |
| <b>0 ppm – Mean</b>                              | NA                   | 8.46                   |
| <b>4000 ppm – Mean</b>                           | NA                   | 8.01                   |
|                                                  |                      |                        |
| <b>Level 4 - Thalamus/Cortex – Overall Width</b> | NA                   | 13 – 14.5              |
| <b>0 ppm – Mean</b>                              | NA                   | 14.5                   |
| <b>4000 ppm – Mean</b>                           | NA                   | 13.5                   |
|                                                  |                      |                        |
| <b>Level 5 – Thalamus Width</b>                  | 7.33 – 8.11          | 7 – 7.88               |
| <b>0 ppm – Mean</b>                              | 8.11                 | 7.88                   |
| <b>4000 ppm – Mean</b>                           | 7.49                 | 7.28                   |
|                                                  |                      |                        |
| <b>Level 5 – Hippocampus – Width Overall</b>     | 1.34 – 1.55          | NA                     |
| <b>0 ppm – Mean</b>                              | 1.55                 | NA                     |
| <b>4000 ppm – Mean</b>                           | 1.45                 | NA                     |

Values (mm) are not adjusted for terminal body weight. Range of historic controls = means from 5 studies that were initiated in 2000 – 2002, including the control group from the thiamethoxam study. Mean values from control (0 ppm) and high-dose (4000 ppm) groups in the thiamethoxam study (unadjusted) are also shown, for comparison. NA = not applicable.

**Suppl. Table 4. Selected literature studies for the effects of postnatal or gestational nicotine exposure in rats on motor activity**

|                             | Exposure                                                                                      | Dose                                                                | Route                              | Weight loss?                                          | Age of testing                                     | Activity Test        | Motor activity results                                                               |                                                     |          |
|-----------------------------|-----------------------------------------------------------------------------------------------|---------------------------------------------------------------------|------------------------------------|-------------------------------------------------------|----------------------------------------------------|----------------------|--------------------------------------------------------------------------------------|-----------------------------------------------------|----------|
|                             |                                                                                               |                                                                     |                                    |                                                       |                                                    |                      | Horizontal activity                                                                  | Habituation                                         | Rearing  |
| Huang et al. 2007           | PND 1-7                                                                                       | 6 mg/kg/day<br>(2 mg/kg<br>3x/day)                                  | Gavage                             | Yes                                                   | PND 35 and<br>70                                   | 10 min<br>open field | ↓ (35) or Θ<br>(70)                                                                  | N.M.                                                | ↓        |
| Thomas<br>2000              | PND 4-9                                                                                       | 6 mg/kg/day<br>(1.5 mg/kg<br>4x/day)                                | Gastronomy<br>tube                 | No <sup>1</sup>                                       | PND 18-19                                          | 1 hr open<br>field   | ↑                                                                                    | Θ                                                   | N.M.     |
| Peters et<br>al. 1979       | 2 mo prior to<br>mating until birth<br>(cross fostered) or<br>weaning (not<br>cross fostered) | 6 mg/kg/day                                                         | Drinking<br>water                  | Yes<br>(males only<br>birth weight<br>reported)       | PND 60-80                                          | 24-hr<br>home cage   | <i>Not cross-<br/>fostered:</i> ↑<br>day; ↓ night;<br><i>cross-fostered</i><br>↑ day | N.M. <sup>2</sup>                                   | N.M.     |
| Newman<br>et al. 1999       | Gestation (19<br>days) until PND<br>16                                                        | 0.75, 1.5, 3.0<br>mg/kg/day                                         | Osmotic<br>minipumps<br>in dams    | Yes at birth<br>(↑ PND 14<br>due to ↓ litter<br>size) | PND 14 and<br>21                                   | 40 min<br>open field | ↑ 0.75 and 3.0<br>at PND 14 but<br>not PND 21                                        | No habituation<br>in controls or<br>treated         | N.M.     |
| LeSage<br>2006              | GD 4 -delivery                                                                                | 2 mg/kg/day<br>(0.03 mg/kg<br>every 14 min<br>16 hr/day)            | i.v. cannula<br>to jugular<br>vein | Yes                                                   | PND 19-21                                          | 30 min<br>open field | ↓ (n.s.)                                                                             | ↓ activity first<br>5-min                           | ↓ (n.s.) |
| Schneider<br>2012           | Gestation: 3<br>weeks before<br>mating until<br>delivery                                      | 4.2 mg/kg                                                           | Drinking<br>Water                  | Yes, and pair-<br>fed control<br>group<br>included    | PND 25-40<br>(testing on 9<br>consecutive<br>days) | 1 hr open<br>field   | ↑ (4 <sup>th</sup> to 9 <sup>th</sup><br>day of testing)                             | Less<br>habituation<br>after first 15<br>min period | N.M.     |
| Tizabi<br>2000 <sup>3</sup> | GD 4 to delivery                                                                              | 9 mg/kg/day<br>(previous<br>study no<br>effects 3 & 6<br>mg/kg/day) | s.c. via<br>Osmotic<br>mini pump   | Yes                                                   | PND 20-24<br>(daily for 4<br>consecutive<br>days)  | 1 hr open<br>field   | Θ <sup>4</sup>                                                                       | N.M.                                                | ↑        |

n.s. not statistically significant; N.M. not measured

Θ signifies endpoint was measured but no effects were reported

<sup>1</sup> Some adjustments to diet were made<sup>2</sup> Day and night pattern within 24-hr session was measured so “habituation”, as defined by EPA guidelines within a shorter session, was measured<sup>3</sup> Litter was not used as the experimental unit.<sup>4</sup> The authors state there was a numerical increase in horizontal activity that was not statistically significant, but based on inspection of figure and final conclusions there are no overall effects.
